# Supplementary material
Source: publisher figshare collection journal article supplement (https://acs.figshare.com/ndownloader/files/3919564)
Supplement: Supplementary file 1 [file 3919564]

# Construction of ZnO/ZnS/CdS/CuInS<sub>2</sub> Core-shell Nanowire Arrays via Ion Exchange: p-n Junction Photoanode with Enhanced Photoelectrochemical Activity under Visible Light

Yu-Xiang Yu\*, Wei-Xin Ouyang, Zhou-Ting Liao, Bin-Bin Du, Wei-De, Zhang\*

School of Chemistry and Chemical Engineering, South China University of Technology, 381 Wushan Road, Guangzhou 510640, People's Republic of China

## *STEM-EDS elemental mapping*

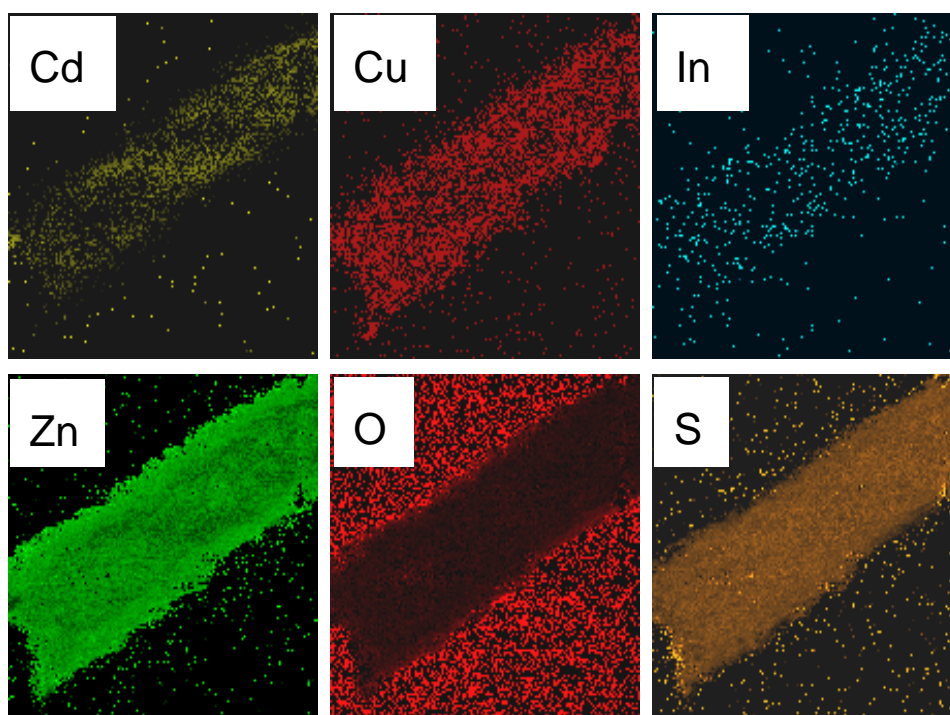

Fig. S1 STEM-EDS elemental maps of a ZnO/ZnS/CdS/CuInS<sub>2</sub> nanowire, Cd, Cu, In, Zn, O and S, respectively.

Fig. S1 displays STEM-EDS elemental mapping of a single nanowire. Cd, Cu, In, Zn, O and S elements distributed evenly over the entire nanowire without technically noticeable separation.

## XPS analysis

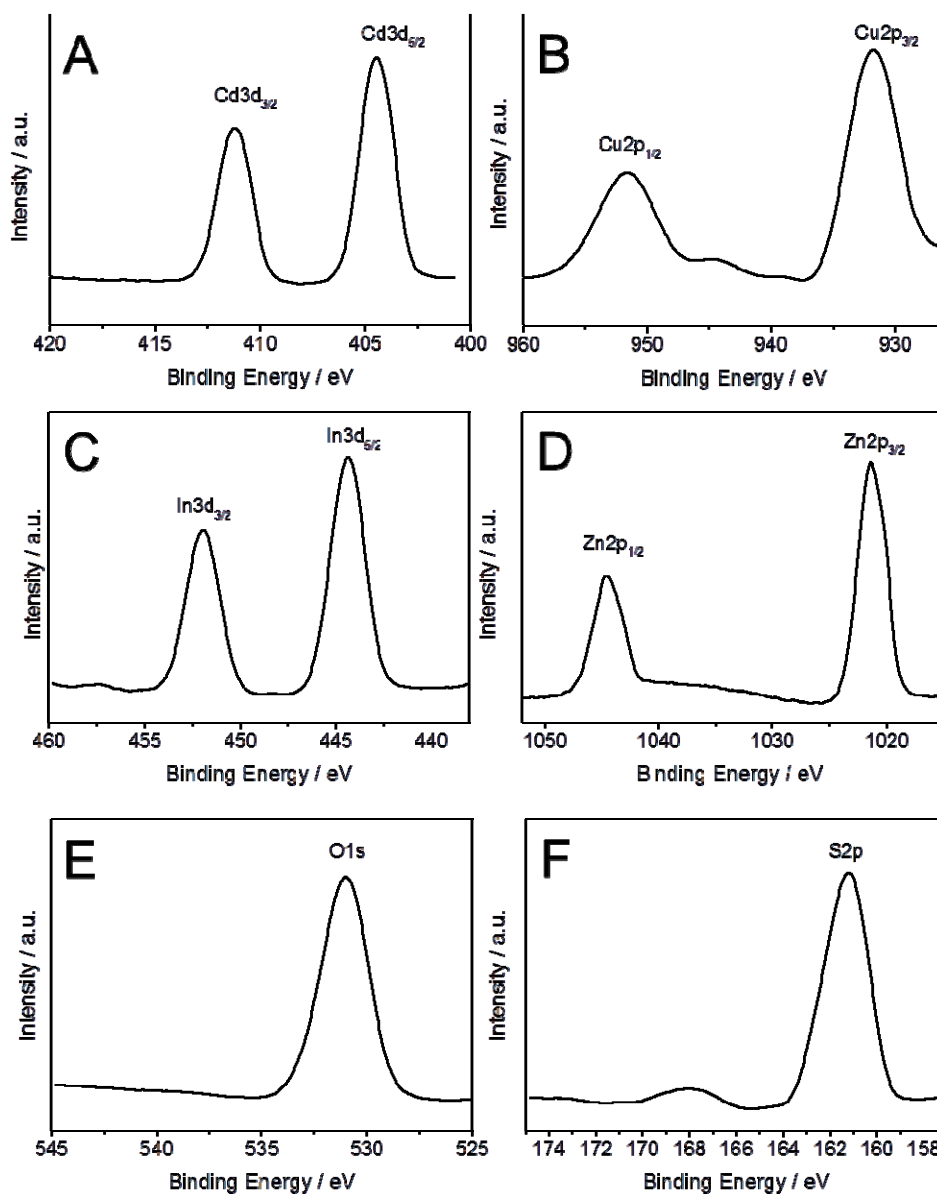

Fig. S2 XPS spectra of (A) Cd 3d, (B) Cu 3d, (C) In 3d, (D) Zn 2p, (E) O 1s and (F) S 2p of the ZnO/ZnS/CdS/CuInS<sub>2</sub> sample.

XPS spectra of the ZnO/ZnS/CdS/CuInS<sub>2</sub> are given in Fig. S2. Cd, Cu, In, Zn, O, and S elements are detected. The peaks are calibrated with respect to adventitious carbon at 284.8 eV. The binding energy of Cd 3d<sub>5/2</sub>, Cu 2p<sub>3/2</sub>, In 3d<sub>5/2</sub>, Zn 2p<sub>3/2</sub>, O 1s

and S 2p are 404.6, 931.8, 444.4, 1021.4, 531.0 and 161.2 eV, respectively, which agree with ZnO, ZnS, CdS and CuInS<sub>2</sub><sup>1-2</sup>.

## References and Notes

1. Li, Y. B.; Liu, Z. F.; Wang, Y.; Liu, Z. C.; Han, J. H.; Ya, J., ZnO/CuInS<sub>2</sub> Core/Shell Heterojunction Nanoarray for Photoelectrochemical Water Splitting. *Int. J. Hydrogen Energy* **2012**, *37*, 15029-15037.
2. Andres, S.; Lehmann, C.; Pettenkofer, C., Epitaxial Growth of ZnO on CuInS<sub>2</sub> (112). *Thin Solid Films* **2009**, *518*, 1032-1035.
